## CHLORIDE-DEPENDENT ORGANIC PHOSPHATE SENSITIVITY OF THE OXYGENATION REACTION IN CROCODYLIAN HEMOGLOBINS

ROY E. WEBER

*Department of Zoophysiology, Institute of Biological Sciences, University of Aarhus,  
DK-8000 Aarhus C, Denmark*

AND FRED N. WHITE\*

*Physiology Research Laboratory, Scripps Institution of Oceanography, La Jolla,  
CA 92093, USA*

*Accepted 21 March 1994*

### Summary

We show that crocodilian hemoglobins (Hbs), which previously have been considered to be model pigments lacking allosteric interaction with organic phosphate esters, do exhibit oxylabile ATP and 2,3-diphosphoglycerate (DPG) binding that decreases O<sub>2</sub> affinity and increases pH sensitivity (Bohr effect), in the absence of Cl<sup>-</sup> and at the low Cl<sup>-</sup> concentrations that may occur in crocodilian plasma during 'post-ingestive alkaline tides'. Hbs from different species vary in their phosphate sensitivities. In *Alligator mississippiensis* Hb, O<sub>2</sub> affinity shows greater ATP than DPG sensitivity at low [cofactor]/[Hb] ratios. In *Paleosuchus palpebrosus* Hb, where even a high Cl<sup>-</sup> concentration (0.1 mol l<sup>-1</sup>) does not completely suppress the phosphate effects, the opposite is true, whereas both ATP and DPG exert similar effects in *Caiman crocodilus* Hb. Lactate, at concentrations that may occur after intensive exercise, similarly depresses Hb O<sub>2</sub>-affinity, indicating an O<sub>2</sub> demand/O<sub>2</sub> supply feedback regulation. Curiously, inositol hexaphosphate (IHP), a potent allosteric effector in other vertebrate Hbs, has no effect on *A. mississippiensis* and *P. palpebrosus* Hb and only small effects on *C. crocodilus* Hb, presumably because of steric hindrance at the binding site. The molecular mechanisms underlying the observations (particularly the implication of β82-Lys, i.e. the lysine residue at position 82 of the β-chains that binds phosphate and Cl<sup>-</sup>) are considered. Their physiological significance requires further study.

### Introduction

Vertebrate Hbs have high intrinsic O<sub>2</sub> affinities that are decreased by organic phosphates found in the red cells. These allosteric effectors, which are commonly ATP and/or GTP in fish, ATP and/or DPG in amphibians and reptiles, inositol pentaphosphate

\*Present address: PO Box 633, Fredericksburg, TX 78624, USA.

Key words: allosteric effects, crocodilian hemoglobin, ATP, chloride binding, diphosphoglycerate, oxygen-affinity regulation.

(IPP) in birds and DPG in mammals, bind in 1:1 stoichiometry to deoxygenated Hb tetramers, becoming displaced upon oxygenation as the Hb molecules shift into the oxygenated structure (Perutz, 1983; Weber and Jensen, 1988; Weber and Wells, 1989).

Crocodylians, however, have low organic phosphate concentrations and their Hb O<sub>2</sub>-affinities have been found to be insensitive to ATP, DPG and IPP but to be strongly depressed by CO<sub>2</sub> (Bauer and Jelkmann, 1977; Jelkmann and Bauer, 1980; Grigg *et al.* 1993). This functional transformation is attributed to a few key amino acid substitutions that convert the phosphate binding site into two HCO<sub>3</sub><sup>-</sup> binding sites and concomitantly depress the oxygenation-linked binding of chloride and CO<sub>2</sub> (Bauer *et al.* 1981; Leclercq *et al.* 1981; Perutz *et al.* 1981).

Previous studies on crocodylian Hbs were carried out at high (100 mmol l<sup>-1</sup>) Cl<sup>-</sup> concentrations, whereas Cl<sup>-</sup> levels in vertebrate red cells may be considerably lower (Nikinmaa, 1990), especially in reptiles (e.g. 32 mmol l<sup>-1</sup> in *Chrysemys picta belli*, Maginiss and Hitzig, 1987). In crocodylians, plasma Cl<sup>-</sup> levels may fall drastically (e.g. from 95 to 7 mmol l<sup>-1</sup> while plasma HCO<sub>3</sub><sup>-</sup> concentrations may increase to 105 mmol l<sup>-1</sup>, in *Alligator mississippiensis*, Coulson and Hernandez, 1983) during the 'alkaline tides' that follow feeding. Given, moreover, that red cell Cl<sup>-</sup> levels are influenced by the same pathways that control H<sup>+</sup> and HCO<sub>3</sub><sup>-</sup> concentrations and that the same amino acid residue, β82-Lys (which is preserved in the crocodylian Hbs, LeClercq *et al.* 1981), is implicated in binding of the phosphate cofactors, as well as Cl<sup>-</sup>, we investigated the effects of phosphates in crocodylian Hbs at different pH conditions and divergent Cl<sup>-</sup> concentrations.

### Materials and methods

Blood was drawn by caudal or cardiac venepuncture from adult specimens of the American alligator *Alligator mississippiensis* (Daudin), the spectacled caiman *Caiman crocodilus* (Linnaeus) and the dwarf caiman *Paleosuchus palpebrosus* (Cuvier). The red cells were washed in 0.9% NaCl and lysed by osmotic shock or freezing. After the cell ghosts had been separated by centrifugation, the supernatant Hb was stripped by column chromatography using Sephadex G25 Fine beads (Berman *et al.* 1971) or MB1 mixed-ion exchanger. The Hb was dialysed for 24 h against at least three changes of 0.01 mol l<sup>-1</sup> Hepes buffer containing 5 × 10<sup>-4</sup> mol l<sup>-1</sup> EDTA. The Hb showed no oxidation, as judged from equal absorption values at 539 and 569 nm after brief equilibration with carbon monoxide, and was frozen at -80 °C in 150 μl samples that were individually thawed for O<sub>2</sub> equilibrium measurements.

O<sub>2</sub> equilibria were determined at 25 °C using a modified gas diffusion chamber, fed by cascaded Wösthoff pumps (Bochum, Germany) for mixing air and pure N<sub>2</sub> (>99.998%) (Weber, 1981; Weber *et al.* 1987). The effects of ATP (disodium salt), DPG (pentacyclohexylammonium salt), IHP (sodium salt) and lactate [L(+) lithium salt] were investigated by addition of accurate volumes of approximately 100 mmol l<sup>-1</sup>, Cl<sup>-</sup>-free standard solutions. Concentrations of the nucleoside triphosphate and lactate in these solutions were assayed (to 2 mmol l<sup>-1</sup> accuracy) using, respectively, Sigma and Boehringer test chemicals. Cl<sup>-</sup> was added as KCl and assayed (to 1 mmol l<sup>-1</sup> accuracy)

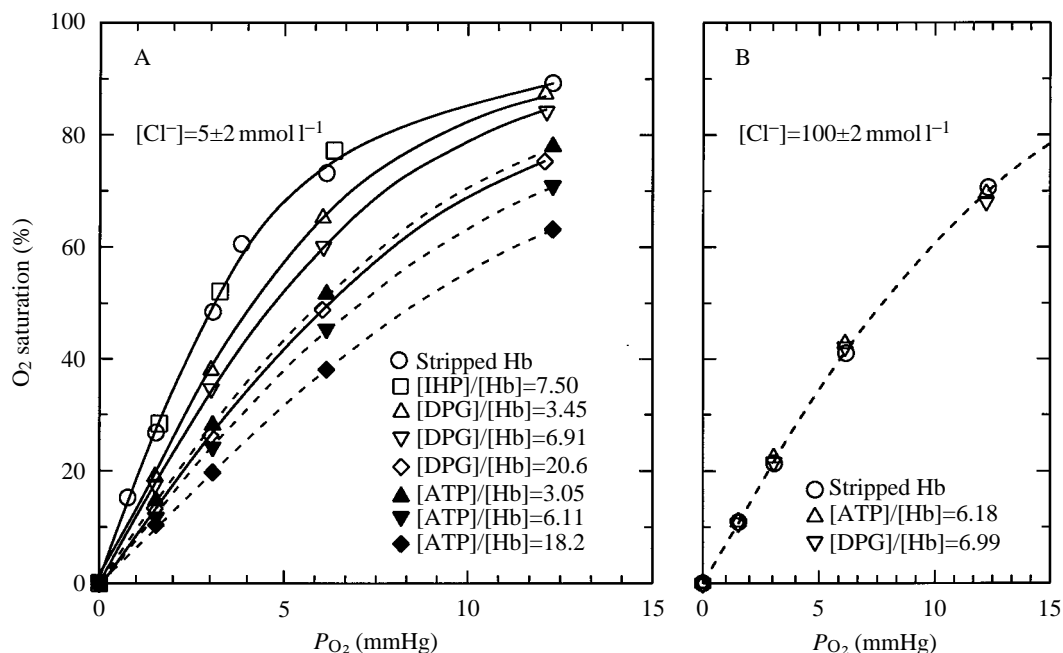

Fig. 1. Effects of [DPG]/[Hb], [ATP]/[Hb] and [IHP]/[Hb] ratios on the  $O_2$  equilibria of *Alligator mississippiensis* Hb in  $0.1 \text{ mol l}^{-1}$  Hepes buffer, pH 7.1, at  $25^\circ\text{C}$ . Hb concentration (tetramer basis),  $0.17 \text{ mmol l}^{-1}$ . (A) At  $5 \pm 2 \text{ mmol l}^{-1} \text{ Cl}^-$ . (B) Overlapping  $O_2$  equilibrium curves at  $100 \text{ mmol l}^{-1} \text{ Cl}^-$  in the absence and presence of ATP and DPG.

using a Radiometer (Copenhagen) CMT10 chloride titrator.  $O_2$  equilibria were measured in  $0.1 \text{ mol l}^{-1}$  Hepes buffer, which does not perturb the free  $\text{Cl}^-$  concentration, as may occur with (Bis)Tris buffers (Weber, 1992). The pH was measured using a Radiometer BMS 2 Mk thermostatted microelectrode. Values of  $P_{50}$  (oxygen tensions at half-saturation of the Hb) obtained at slightly different values from the target pH values were corrected using the appropriate Bohr factors ( $\phi = \Delta \log P_{50} / \Delta \text{pH}$ ), obtained by  $P_{50}$  measurement at other pH values.

## Results

The effect of organic phosphates and of  $\text{Cl}^-$  on *A. mississippiensis* Hb at pH 7.1 are shown in Figs 1–4. While ATP and DPG had no effect on the  $O_2$  affinity of the Hb in the presence of  $100 \text{ mmol l}^{-1} \text{ Cl}^-$  (Fig. 1B), they markedly reduced Hb  $O_2$ -affinity at low  $\text{Cl}^-$  concentration ( $5 \pm 2 \text{ mmol l}^{-1}$ ), the effect of ATP being more pronounced than that of DPG. Significantly, IHP did not influence oxygen binding (Fig. 1A).

Measurements at different pH values (Fig. 2) confirm that ATP has a greater effect than DPG and show that effector action and the difference between the ATP and DPG effects increase with decreasing pH, where the cationic binding sites become increasingly charged. The  $\phi$  value of  $-0.20$  observed at  $7 \text{ mmol l}^{-1} \text{ Cl}^-$  (interpolated for pH 7.4–7.6; see Fig. 2) equals the fixed-acid Bohr factor observed in *A. mississippiensis* blood (Weber

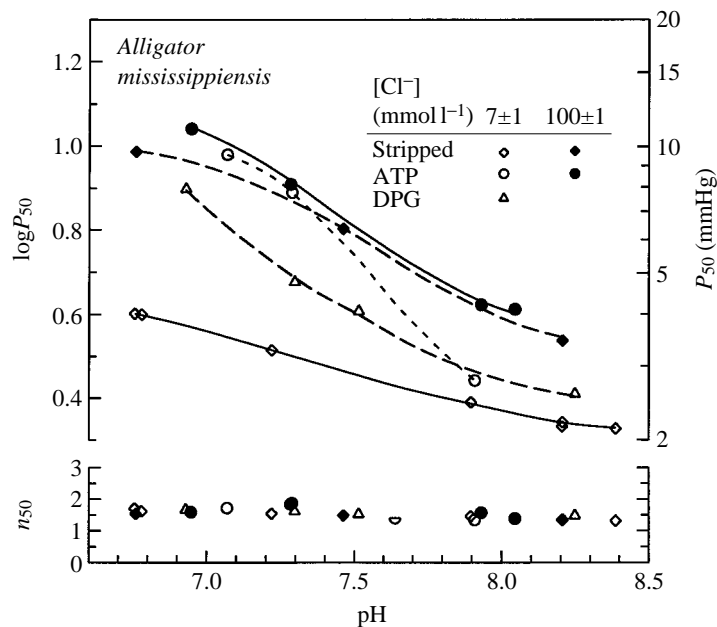

Fig. 2. Effects of saturating concentrations (molar excess over Hb tetramers  $>25$ ) of ATP (circles) and DPG (triangles) on  $P_{50}$  and  $n_{50}$  of stripped *Alligator mississippiensis* Hb in  $0.1 \text{ mol l}^{-1}$  Hepes buffer at different pH values. Open symbols,  $7 \pm 1 \text{ mmol l}^{-1} \text{ Cl}^{-}$ ; filled symbols,  $100 \pm 1 \text{ mmol l}^{-1} \text{ Cl}^{-}$ . Hb concentration (tetramer basis),  $0.21 \text{ mmol l}^{-1}$ .

and White, 1986). This value is raised to  $-0.33$  in the presence of  $100 \text{ mmol l}^{-1} \text{ Cl}^{-}$  and to  $-0.36$  and  $-0.75$  in the presence of saturating concentrations of, respectively, DPG and ATP. At pH values below 7.3, the effectiveness of ATP approximates that of  $100 \text{ mmol l}^{-1} \text{ Cl}^{-}$ . In contrast to the phosphate effects, the  $\text{Cl}^{-}$  effect remains pronounced at high pH (Fig. 2). Lactate decreased Hb  $\text{O}_2$ -affinity at high as well as at low  $[\text{Cl}^{-}]$  (Fig. 3). The tested effectors had no significant effects on the Hill's cooperativity coefficients at half-saturation ( $n_{50}$ ), which varied between 1.5 and 1.7 (Figs 2 and 3). These values are low compared with those of mammalian Hbs, but may be raised by the presence of  $\text{HCO}_3^{-}$  (as in *Crocodylus porosus* Hb, Brittain and Wells, 1991).

While confirming the lack of an IHP effect, dose-response curves (Fig. 4) show greatest ATP and DPG sensitivities at low  $[\text{phosphate}]/[\text{Hb}]$  ratios, greater oxygenation-linked binding of ATP than of DPG at all ratios tested and that all these effects are obliterated in the presence of added  $\text{Cl}^{-}$ .

In *C. crocodylus* Hb, the phosphate effects expressed at low  $\text{Cl}^{-}$  levels were similarly abolished in the presence of  $100 \text{ mmol l}^{-1} \text{ Cl}^{-}$  (Fig. 5). However, in contrast to the greater effect of ATP in *A. mississippiensis*, the ATP and DPG effects were similar. Also, *C. crocodylus* Hb showed distinct oxygenation-linked IHP binding at low  $\text{Cl}^{-}$  concentration.

*P. palpebrosus* Hb measured at pH 7.4 and 7.0 (Fig. 6A,B) showed pronounced ATP and DPG sensitivity in the absence of  $\text{Cl}^{-}$ . In contrast to *A. mississippiensis* Hb, however,

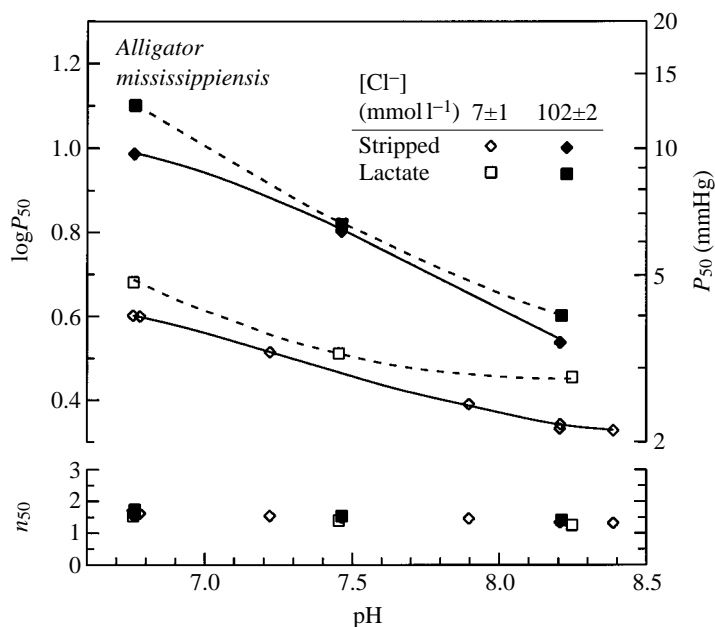

Fig. 3. Effect of  $0.23 \text{ mmol l}^{-1}$  lactate (squares) on oxygenation properties of stripped *Alligator mississippiensis* Hb measured at  $7 \pm 1$  and  $102 \pm 2 \text{ mmol l}^{-1} \text{ Cl}^{-}$  (open and filled symbols, respectively) in  $0.1 \text{ mol l}^{-1}$  Hepes buffer. Hb concentration (tetramer basis),  $0.21 \text{ mmol l}^{-1}$ .

the DPG effect exceeded that of ATP at low phosphate levels. While both effects were reduced, they remained distinct in the presence of  $100 \text{ mmol l}^{-1} \text{ Cl}^{-}$ , particularly at the lower pH (Fig. 6B), where ATP and DPG compete more effectively with  $\text{Cl}^{-}$  for binding sites. No oxylabile IHP binding was evident at either pH tested. Surprisingly, high levels of DPG decreased  $\text{O}_2$  affinity more in the absence than in the presence of  $\text{Cl}^{-}$ .

### Discussion

Our data show that the vertebrate allosteric cofactors ATP and DPG do modulate  $\text{O}_2$  affinity of crocodilian Hbs at low  $\text{Cl}^{-}$  concentrations; claims of phosphate insensitivity of these Hbs thus require qualification. The finding is interesting with respect to structure–function relationships in heme proteins and also has possible physiological implications, given the low plasma  $\text{Cl}^{-}$  values associated with the post-feeding ‘alkaline tides’ that follow massive secretion of HCl into the stomach to dissolve consumed bones (Coulson and Hernandez, 1983).

ATP is the main potential organic modulator encountered in adult crocodilian erythrocytes. In *Crocodylus porosus*, *C. johnstoni* and *C. novaeguineae*, cellular ATP concentrations vary between  $0.54$  and  $0.70 \text{ mmol l}^{-1}$  ( $0.14$ – $0.15 \text{ mol mol}^{-1} \text{ Hb}$ ) and are 2–3 times greater than the corresponding DPG levels of  $0.23$ – $0.27 \text{ mmol l}^{-1}$  (Grigg and Gruca, 1979). Cofactor concentrations may be much higher in the embryonic stages. In

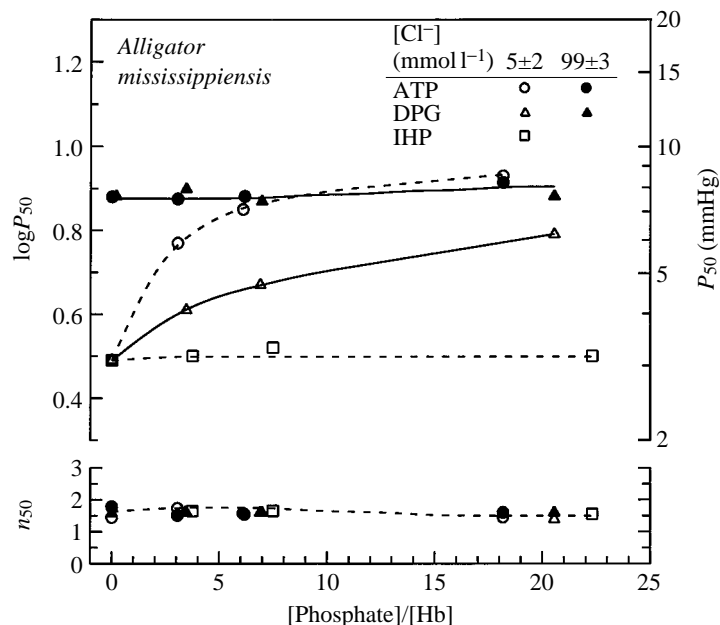

Fig. 4. Dose-response curves for the effects of ATP (circles), DPG (triangles) and IHP (squares) on  $P_{50}$  and  $n_{50}$  values of *Alligator mississippiensis* Hb in  $0.1 \text{ mol l}^{-1}$  Hepes buffer, pH 7.1, at  $5 \text{ mmol l}^{-1}$  (open symbols) and  $99 \text{ mmol l}^{-1}$  (filled symbols)  $\text{Cl}^-$ . Hb concentration (tetramer basis),  $0.17 \text{ mmol l}^{-1}$ .

*C. porosus* (Grigg *et al.* 1993), ATP levels approach  $100 \mu\text{mol g}^{-1}$  Hb (approximately  $6.5 \text{ mol mol}^{-1}$  Hb) at 15 days of embryonic development and DPG levels peak at  $18 \mu\text{mol g}^{-1}$  Hb (approximately  $1.2 \text{ mol mol}^{-1}$  Hb) at about 80 days of development. Both effectors exert pronounced effects on the  $\text{O}_2$  affinity of the embryonic Hb, that of ATP being greater (as here recorded for adult *A. mississippiensis* Hb). Grigg *et al.* (1993) observed small ATP and DPG effects in adult *C. porosus* Hb in the presence of  $100 \text{ mmol l}^{-1}$   $\text{Cl}^-$  (similar to those reported here for *P. palpebrosus* Hb), but decreased phosphate interaction as pH fell below 7.8.

In human Hb (which has served as a model for probing allosteric interactions in hemoglobins and other proteins), organic phosphates bind at four pairs of cationic amino acid residues facing the cavity between the two  $\beta$ -chains. These are  $\beta 1$ -Val,  $\beta 2$ -His,  $\beta 82$ -Lys and  $\beta 143$ -His (i.e. valine, histidine, lysine and histidine found at positions 1, 2, 82 and 143, respectively; Perutz, 1983). The phosphate-insensitivity of crocodilian Hbs (established in the presence of  $\text{Cl}^-$ ) correlates with the substitution of  $\beta 1$ -Val and  $\beta 2$ -His by acetylated Ala and Ser, respectively, in *A. mississippiensis* and *Crocodylus niloticus*, and by Ser and Pro in *C. crocodylus*, and the replacement of  $\beta 143$ -His by Ala in all these species (Leclercq *et al.* 1981). In crocodilian Hbs,  $\text{HCO}_3^-$  binds at the  $\beta 1$  residue and at  $\beta 82$ -Lys and  $\beta 144$ -Glu (Perutz *et al.* 1981). Allosteric interaction of phosphates with the N-terminal residues is excluded, either by their acetylation or by the adjacent  $\beta 2$ -His $\rightarrow$ Pro substitution that bends the N termini away from the 'phosphate site' (Perutz

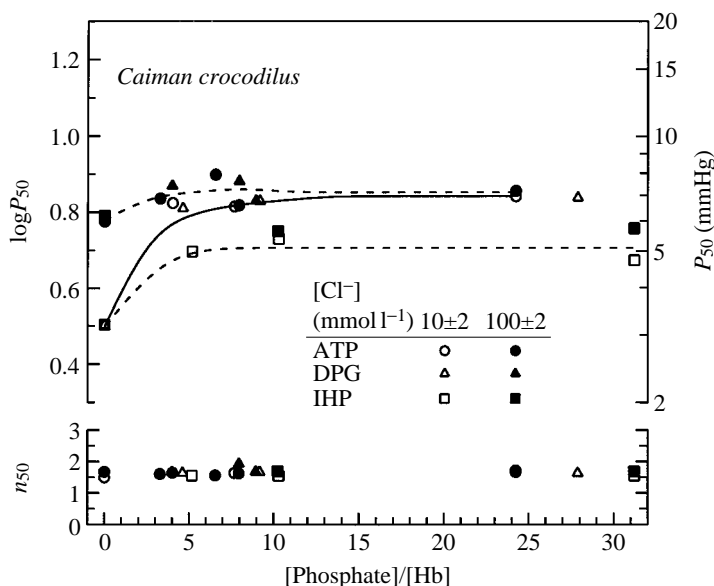

Fig. 5. Dose-response curves for the effects of ATP (circles), DPG (triangles) and IHP (squares) on  $P_{50}$  and  $n_{50}$  values of *Caiman crocodilus* Hb in  $0.1 \text{ mol l}^{-1}$  Hepes buffer, pH 7.1, and at  $10 \text{ mmol l}^{-1}$  (open symbols) and  $100 \text{ mmol l}^{-1}$  (filled symbols)  $\text{Cl}^{-}$ . Hb concentration (tetramer basis),  $0.17 \text{ mmol l}^{-1}$ .

*et al.* 1981). This leaves only  $\beta 82$ -Lys as a phosphate binding residue, which has been considered an insufficient basis for affinity modulation, since it is present in human fetal Hb that shows a reduced DPG sensitivity although it still has  $\beta 2$ -His (cf. Bunn and Briehl, 1970; Perutz *et al.* 1981). The present data, however, indicate an important role for  $\beta 82$ -Lys in phosphate modulation of tetrameric Hbs.

In human Hb, chloride ions bind mainly at  $\alpha 1$ -Val (also interacting with  $\alpha 131$ -Ser) and at  $\beta 82$ -Lys (also interacting with  $\beta 1$ -Val; cf. Riggs, 1988). Both these groups contribute to the Bohr effect in the absence of phosphates, and  $\beta 82$ -Lys is considered to be important for the expression of the Bohr effect in Hbs that have no or reduced phosphate effects (Riggs, 1988; Perutz *et al.* 1980). In the crocodilian Hbs that have been sequenced (caiman, alligator and Nile crocodile),  $\alpha 131$ -Ser is replaced by Ala, which may inactivate  $\text{Cl}^{-}$  binding at  $\alpha 1$ -Val (Perutz *et al.* 1981), leaving  $\beta 82$ -Lys as the predominant  $\text{Cl}^{-}$  binding site. This is consistent with the lesser augmentation of the Bohr factor by chloride in alligator Hb (where  $100 \text{ mmol l}^{-1} \text{Cl}^{-}$  raises  $\phi$  from  $-0.20$  to  $-0.33$ , see Fig. 2) than in deionized human Hb, where addition of  $\text{Cl}^{-}$  to  $100 \text{ mmol l}^{-1}$  increases  $\phi$  from  $-0.2$  to  $-0.5$  by raising the pKa values of both  $\alpha 1$ -Val and  $\beta 82$ -Lys (Perutz, 1989). The greater effect of ATP and DPG than of  $0.1 \text{ mol l}^{-1} \text{Cl}^{-}$  in increasing the Bohr factor of stripped Hb (see Fig. 2) is a manifestation of their pH-dependent oxylabile binding to crocodilian Hb.

That a common site (probably  $\beta 82$ -Lys) is implicated in phosphate and chloride ion binding follows from the strong suppression of the phosphate effect caused by  $\text{Cl}^{-}$  addition. This effect is mirrored by the progressive decrease in the  $\text{Cl}^{-}$  effect (indicated

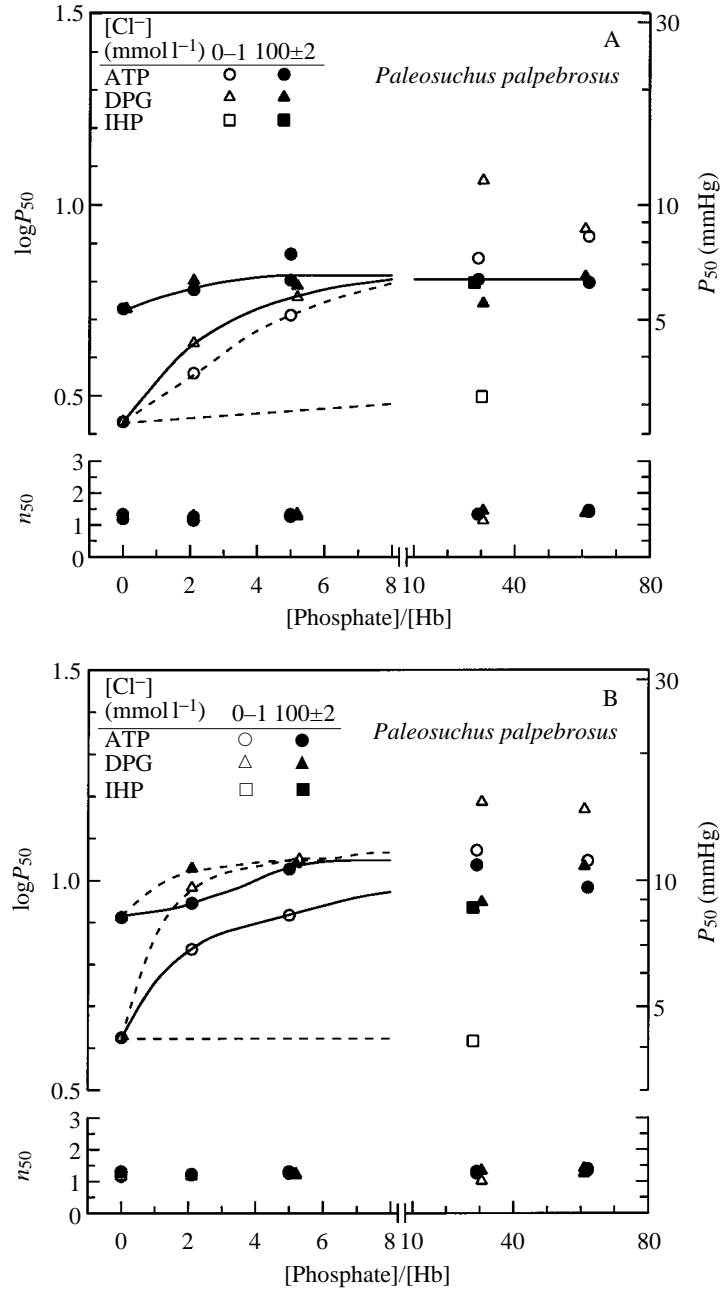

Fig. 6. (A) Dose-response curves for the effects of ATP (circles), DPG (triangles) and IHP (squares) on  $P_{50}$  and  $n_{50}$  values of *Paleosuchus palpebrosus* Hb in  $0.1 \text{ mol l}^{-1}$  HEPES buffer, pH 7.4, in the absence of  $\text{Cl}^-$  (open symbols) and the presence of  $100 \text{ mmol l}^{-1} \text{ Cl}^-$  (filled symbols). Hb concentration (tetramer basis),  $0.09 \text{ mmol l}^{-1}$ . (B) Effects of ATP, DPG and IHP on  $P_{50}$  and  $n_{50}$  values of *P. palpebrosus* Hb at pH 7.0. Other conditions as in A.



by the distances between similarly shaped open and filled symbols in Figs 4–6) with increasing phosphate concentration. Thus, at low [phosphate]/[Hb] ratios, ATP depresses  $\text{Cl}^-$  binding more than DPG does in *Alligator mississippiensis* Hb, whereas the opposite applies to *P. palpebrosus* Hb.

The Hbs studied here illustrate a series of varying phosphate interaction. *A. mississippiensis* Hb distinguishes between ATP and DPG, showing greater oxygenation-linked binding of the former (Fig. 4). Given that ATP and DPG carry similar charges at physiological pH, this specificity presumably reflects stereochemical differences in the protein moiety, whereby ATP provides a better fit and thus is more effective in stabilizing the deoxygenated structure and in decreasing  $\text{O}_2$  affinity. The lack of an IHP effect is opposite to expectations based on its greater negativity and suggests that allosteric interaction between crocodilian Hbs and large polyanions is impeded by steric hindrance at the phosphate binding sites.

*P. palpebrosus* Hb similarly differentiates between ATP and DPG (Fig. 6A,B) but, in contrast to *A. mississippiensis* Hb, shows a greater response to the smaller DPG molecules. The greater ATP and DPG effects at pH 7.0 than at pH 7.4 accord with the pH-dependence of anion binding. The intriguing finding that  $\text{O}_2$  affinities at high [DPG]/[Hb] ratios were lower in the absence, than in the presence, of  $\text{Cl}^-$  (Fig. 6A,B) may reflect a high stereochemical complementarity between DPG and the binding site, resulting in greater stabilization of the deoxygenated structure than that obtained in the presence of the smaller chloride ions. As with *A. mississippiensis*, the anion binding pocket of *P. palpebrosus* Hb appears to be unable to accommodate the relatively large IHP molecules (Fig. 6A,B). *C. crocodilus* Hb, displaying similar ATP and GTP effects and distinct, albeit reduced, IHP effects appears to be the least discriminating as regards phosphate binding.

‘The languid existence of crocodiles can be interrupted by fierce activity during escape, defense and predation’ (Seymour *et al.* 1985, p. 144). In *C. porosus*, where the susceptibility to resultant acid–base disturbances increases with body size (Bennett *et al.* 1985), this may cause blood lactate concentrations to rise to  $70 \text{ mmol l}^{-1}$  and pH to fall to 6.4 for long periods (>14 h). As with ATP or  $\text{HCO}_3^-$ , lactate may influence Hb  $\text{O}_2$ -transporting properties and thus form a direct, regulatory feedback for adjusting tissue  $\text{O}_2$  supply to demand. In human Hb, lactate has similar effects to  $\text{Cl}^-$  at concentrations below  $0.1 \text{ mmol l}^{-1}$ , but an approximately 40% greater effect at higher concentrations (Guesnon *et al.* 1979). Lactate, at a concentration that approximates the plasma value in exercised *A. mississippiensis* (Coulson and Hernandez, 1979), decreases Hb  $\text{O}_2$ -affinity over a wide pH range (Fig. 3). Its seemingly greater effect at low  $\text{Cl}^-$  concentration suggests competition with chloride ions for the same binding sites. The lactate effect, which may improve  $\text{O}_2$  unloading in the tissues, could be due either to greater lactate binding to deoxygenated Hb or to lesser binding to oxygenated Hb molecules compared with  $\text{Cl}^-$  binding. The binding constants obtained for human Hb (Guesnon *et al.* 1979) suggest the latter alternative to be the case.

The data describe the functional consequences of the evolution of  $\text{HCO}_3^-$ -sensitivity in crocodilian Hbs. Parallel observations on Hbs from crocodiles or gharials (which represent separate evolutionary lineages compared with the caimans and alligators

studied here, Desmore and Owen, 1989) would give further insight into the mechanisms of allosteric interaction in Hbs of the order Crocodylia. Evaluation of the physiological implications requires further information, e.g. on the  $\text{Cl}^-$  concentration variations 'seen' by the Hb inside the red cells and the interactive effects of  $\text{CO}_2/\text{HCO}_3^-$ .

Lastly, it may be recalled that organic phosphates may have significance other than for altering Hb  $\text{O}_2$ -affinity by allosteric regulation, such as by modifying intracellular pH (and thus  $\text{O}_2$  affinity) *via* changes in the Donnan equilibrium of protons across the red cell membranes (Duhm, 1971; Wood and Johansen, 1973). Grigg and Gruca (1979) postulated that the low phosphate levels in crocodile red cells may be adaptive in decreasing the fixed-acid Bohr effect and thus in maintaining  $\text{O}_2$  loading in the face of a lactate flush following dives.

We thank the Danish Natural Science Research Council for support (Grant 11-0078), Mr Ted Joanen of the Rockefeller Wildlife Refuge, Grand Chenier, Louisiana, for supplying the alligators, the San Diego Zoological Society for loan of *C. crocodylus*, Dr Olaf Behlert (Zoological Gardens, Cologne, Germany) for *P. palpebrosus* blood samples and Mr Donald Ward (La Jolla), Mr John Rossetti (Odense) and Ms Anny Bang (Aarhus) for skilled technical assistance.

### References

- BAUER, C., FORSTER, M., GROS, G., MOSCA, A., PERRELLA, M., ROLLEMA, H. S. AND VOGEL, D. (1981). Analysis of bicarbonate binding to crocodilian hemoglobin. *J. biol. Chem.* **256**, 8429–8435.
- BAUER, C. AND JELKMANN, W. (1977). Carbon dioxide governs the oxygen affinity of crocodile blood. *Nature* **269**, 825–827.
- BENNETT, A. F., SEYMOUR, R. S., BRADFORD, D. F. AND WEBB, G. T. W. (1985). Mass-dependence of anaerobic metabolism and acid–base balance disturbance during activity in the salt-water crocodile, *Crocodylus porosus*. *J. exp. Biol.* **118**, 161–171.
- BERMAN, M., BENESCH, R. AND BENESCH, R. E. (1971). The removal of organic phosphates from hemoglobin. *Archs Biochem. Biophys.* **145**, 236–239.
- BRITTAİN, T. AND WELLS, R. M. (1991). An investigation of the co-operative function of the haemoglobin of the crocodile, *Crocodylus porosus*. *Comp. Biochem. Physiol.* **98B**, 641–646.
- BUNN, H. F. AND BRIEHL, R. W. (1970). The interaction of 2,3-diphosphoglycerate with various human hemoglobins. *J. clin. Invest.* **49**, 1088–1095.
- COULSON, R. A. AND HERNANDEZ, T. (1979). Factors controlling glycogen breakdown in the alligator. *Comp. Biochem. Physiol.* **64C**, 115–121.
- COULSON, R. A. AND HERNANDEZ, T. (1983). Alligator metabolism. Studies on chemical reactions *in vivo*. *Comp. Biochem. Physiol.* **74B**, 1–182.
- DESMORE, L. D. AND OWEN, R. D. (1989). Molecular systematics of the order Crocodylia. *Am. Zool.* **29**, 831–841.
- DUHM, J. (1971). Effects of 2,3-diphosphoglycerate and other organic phosphate compounds on oxygen affinity and intracellular pH of human erythrocytes. *Pflügers Arch.* **326**, 341–356.
- GRIGG, G. C. AND GRUCA, M. (1979). Possible adaptive significance of low red cell organic phosphates in crocodiles. *J. exp. Zool.* **209**, 161–168.
- GRIGG, G. C., WELLS, R. M. G. AND BEARD, L. A. (1993). Allosteric control of oxygen binding by haemoglobin during embryonic development in the crocodile *Crocodylus porosus*: the role of red cell organic phosphates and carbon dioxide. *J. exp. Biol.* **175**, 15–32.
- GUESNON, P., POYART, C., BURSAUX, E. AND BOHN, B. (1979). The binding of lactate and chloride ions to human adult hemoglobin. *Respir. Physiol.* **38**, 115–129.
- JELKMANN, W. AND BAUER, C. (1980). Oxygen binding properties of caiman blood in the absence and presence of carbon dioxide. *Comp. Biochem. Physiol.* **65A**, 331–336.

- LECLERCQ, F., SCHNEK, A. G., BRAUNITZER, G., STANGL, A. AND SCHRANK, B. (1981). Direct reciprocal allosteric interaction of oxygen and hydrogen carbonate. Sequence of the haemoglobins of the caiman (*Caiman crocodilus*), the Nile crocodile (*Crocodylus niloticus*) and the Mississippi crocodile (*Alligator mississippiensis*). *Hoppe-Seyler's Z. physiol. Chem.* **362**, 1151–1158.
- MAGINNISS, L. A. AND HITZIG, B. M. (1987). Acid–base status and electrolytes in red blood cells and plasma of turtles submerged at 3 °C. *Am. J. Physiol.* **253**, R64–R70.
- NIKINMAA, M. (1990). *Vertebrate Red Blood Cells*. Berlin: Springer-Verlag.
- PERUTZ, M. F. (1983). Species adaptation in a protein molecule. *Molec. Biol. Evol.* **1**, 1–28.
- PERUTZ, M. F. (1989). Mechanisms of cooperativity and allosteric regulation in proteins. *Q. Rev. Biophys.* **22**, 139–236.
- PERUTZ, M., BAUER, C., GROS, G., LECLERCQ, F., VANDECASSERIE, C., SCHNEK, A. G., BRAUNITZER, G., FRIDAY, A. E. AND JOYSEY, K. A. (1981). Allosteric regulation of crocodilian haemoglobin. *Nature* **291**, 682–684.
- PERUTZ, M. F., KILMARTIN, J. V., NISHIKURA, K., FOGG, J. H., BUTLER, P. J. G. AND ROLLEMA, H. S. (1980). Identification of residues contributing to the Bohr effect of human haemoglobin. *J. molec. Biol.* **138**, 649–670.
- RIGGS, A. F. (1988). The Bohr effect. *A. Rev. Physiol.* **50**, 181–204.
- SEYMOUR, R. S., BENNETT, A. F. AND BRADFORD, D. F. (1985). Blood gas tensions and acid–base balance in the salt-water crocodile, *Crocodylus porosus*, at rest and after exhaustive exercise. *J. exp. Biol.* **118**, 143–159.
- WEBER, R. E. (1981). Cationic control of O<sub>2</sub> affinity in lugworm erythrocrurin. *Nature* **292**, 386–387.
- WEBER, R. E. (1992). Use of ionic and zwitterionic (Tris/BisTris and Hepes) buffers in studies on hemoglobin function. *J. appl. Physiol.* **72**, 1611–1615.
- WEBER, R. E. AND JENSEN, F. B. (1988). Functional adaptations in hemoglobins from ectothermic vertebrates. *A. Rev. Physiol.* **50**, 161–179.
- WEBER, R. E., JENSEN, F. B. AND COX, R. P. (1987). Analysis of teleost hemoglobin by Adair and Monod–Wyman–Changeux models. Effects of nucleoside triphosphates and pH on oxygenation of tench hemoglobin. *J. comp. Physiol.* **157B**, 145–152.
- WEBER, R. E. AND WELLS, R. M. G. (1989). Hemoglobin structure and function. In *Lung Biology in Health and Disease; Comparative Pulmonary Physiology: Current Concepts* (ed. S. C. Wood and C. Lenfant), chapter 10, pp. 279–310. New York: Marcel Dekker, Inc.
- WEBER, R. E. AND WHITE, F. N. (1986). Oxygen binding in alligator blood related to temperature, diving and 'alkaline tide'. *Am. J. Physiol.* **251**, R901–R908.
- WOOD, S. C. AND JOHANSEN, K. (1973). Organic phosphate metabolism in nucleated red cells: influence of hypoxia on eel HbO<sub>2</sub> affinity. *Neth. J. Sea Res.* **7**, 328–338.
